# Supplementary material for: Water-Soluble Saccharina latissima Polysaccharides and Relation of Their Structural Characteristics with In Vitro Immunostimulatory and Hypocholesterolemic Activities
Source: MDPI journal article supplement (doi:10.3390/md21030183), 2023-03-16
Supplement: s1 [file s1]

## Supplementary material

### Article

#### Water-soluble *Saccharina latissima* polysaccharides and relation of their structural characteristics with *in vitro* immunostimulatory and hypocholesterolemic activities

Ana S. P. Moreira <sup>1</sup>, Diana Gaspar <sup>1</sup>, Sónia S. Ferreira <sup>1</sup>, Alexandra Correia <sup>2,3</sup>, Manuel Vilanova <sup>2,3</sup>, Marie-Mathilde Perrineau <sup>4</sup>, Philip D. Kerrison <sup>4,5</sup>, Claire M. M. Gachon <sup>4,6</sup>, Maria Rosário Domingues <sup>1,7</sup>, Manuel A. Coimbra <sup>1</sup>, Filipe M. Coreta-Gomes <sup>1,8</sup> and Cláudia Nunes <sup>9,\*</sup>

<sup>1</sup> LAQV-REQUIMTE—Associated Laboratory for Green Chemistry of the Network of Chemistry and Technology, Department of Chemistry, University of Aveiro, Campus Universitário de Santiago, 3810-193 Aveiro, Portugal

<sup>2</sup> i3S—Institute for Research and Innovation in Health and IBMC—Institute for Molecular and Cell Biology, University of Porto, 4200-135 Porto, Portugal

<sup>3</sup> ICBAS — Instituto de Ciências Biomédicas de Abel Salazar, Universidade do Porto, 4050-313 Porto, Portugal

<sup>4</sup> Scottish Association for Marine Sciences, Scottish Marine Institute, Oban PA37 1QA, UK

<sup>5</sup> Hortimare BV, Altonstraat 25A, 1704 CC Heerhugowaard, The Netherlands

<sup>6</sup> Unité Molécules de Communication et Adaptation des Micro-Organismes (UMR 7245), Muséum National d'Histoire Naturelle, Centre National de la Recherche Scientifique (CNRS), 75005 Paris, France

<sup>7</sup> CESAM—Centre for Environmental and Marine Studies, Department of Chemistry, University of Aveiro, Campus Universitário de Santiago, 3810-193 Aveiro, Portugal

<sup>8</sup> CQC-IMS — Coimbra Chemistry Centre, Institute of Molecular Sciences, University of Coimbra, 3004-535 Coimbra, Portugal

<sup>9</sup> CICECO — Aveiro Institute of Materials, Department of Materials and Ceramic Engineering, University of Aveiro, Campus Universitário de Santiago, 3810-193 Aveiro, Portugal

\* Correspondence: claudianunes@ua.pt

**Supplementary Table S1.** Content (% w/w) of sulphur (S) and nitrogen (N) determined by elemental analysis, as well as sulphates (calculated as  $-\text{SO}_3^-$ ) and proteins (calculated as  $\text{N} \times 4.37$ ).

| Sample               | Elemental analysis |            | Sulphates<br>(calculated as $-\text{SO}_3^-$ ) | Proteins<br>( $\text{N} \times 4.37$ ) |
|----------------------|--------------------|------------|------------------------------------------------|----------------------------------------|
|                      | S                  | N          |                                                |                                        |
| Sn_CaCl <sub>2</sub> | 2.5 ± 0.03         | 2.6 ± 0.02 | 6.4 ± 0.1                                      | 11.2 ± 0.1                             |
| F1                   | -                  | 0.6 ± 0.04 | -                                              | 2.6 ± 0.2                              |
| F2                   | 1.9 ± 0.3          | 4.7 ± 0.1  | 4.8 ± 0.4                                      | 20.7 ± 0.2                             |
| F3                   | 5.7 ± 0.6          | 1.4 ± 0.01 | 14.3 ± 1.5                                     | 6.2 ± 0.02                             |

Data are presented as mean ± standard deviation.

**Supplementary Table S2.**  $^{13}\text{C}$  NMR assignments of bile salt, cholesterol, Trizma buffer, and TSP standard resonances.

| ppm   | Assignments                                                                 | Molecular Structure                                 |
|-------|-----------------------------------------------------------------------------|-----------------------------------------------------|
| 179.5 | GDCA, C <sub>24</sub> (quaternary carbon)                                   | <b>GDCA Bile Salt</b><br>                           |
| 179.4 | GDCA, C <sub>26</sub> (quaternary carbon)                                   |                                                     |
| 75.7  | GDCA, C <sub>12</sub> (tertiary carbon)                                     |                                                     |
| 74.1  | GDCA, C <sub>3</sub> (tertiary carbon)                                      |                                                     |
| 63.3  | Trizma, C <sub>1</sub> , C <sub>2</sub> , C <sub>3</sub> (methylene carbon) |                                                     |
| 62.7  | Trizma, C <sub>4</sub> (tertiary carbon)                                    |                                                     |
| 50.6  | GDCA, C <sub>14</sub> (tertiary carbon)                                     |                                                     |
| 49.1  | GDCA, C <sub>17</sub> (tertiary carbon)                                     |                                                     |
| 49.0  | GDCA, C <sub>13</sub> (quaternary carbon)                                   |                                                     |
| 46.2  | GDCA, C <sub>25</sub> (methylene carbon)                                    |                                                     |
| 45.0  | GDCA, C <sub>5</sub> (tertiary carbon)                                      | <b><math>^{13}\text{C}_4</math>-Cholesterol</b><br> |
| 44.3  | Cholesterol, $^{13}\text{C}_4$ (tertiary carbon)                            |                                                     |
| 38.9  | GDCA, C <sub>8</sub> (tertiary carbon)                                      |                                                     |
| 38.4  | GDCA, C <sub>20</sub> (tertiary carbon)                                     |                                                     |
| 38.2  | GDCA, C <sub>1</sub> (methylene carbon)                                     |                                                     |
| 38.1  | GDCA, C <sub>4</sub> (methylene carbon)                                     |                                                     |
| 36.8  | GDCA, C <sub>10</sub> (quaternary carbon)                                   |                                                     |
| 36.2  | GDCA, C <sub>9</sub> (tertiary carbon)                                      |                                                     |
| 35.3  | GDCA, C <sub>23</sub> (methylene carbon)                                    |                                                     |
| 34.3  | GDCA, C <sub>22</sub> (methylene carbon)                                    |                                                     |
| 32.1  | GDCA, C <sub>2</sub> (methylene carbon)                                     | <b>Trizma Buffer</b><br>                            |
| 31.2  | GDCA, C <sub>11</sub> (methylene carbon)                                    |                                                     |
| 30.4  | GDCA, C <sub>16</sub> (methylene carbon)                                    |                                                     |
| 30.0  | GDCA, C <sub>6</sub> (methylene carbon)                                     |                                                     |
| 29.0  | GDCA, C <sub>7</sub> (methylene carbon)                                     |                                                     |
| 26.6  | GDCA, C <sub>15</sub> (methylene carbon)                                    |                                                     |
| 25.8  | GDCA, C <sub>19</sub> (methyl carbon)                                       |                                                     |
| 19.5  | GDCA, C <sub>21</sub> (methyl carbon)                                       |                                                     |
| 15.4  | GDCA, C <sub>18</sub> (methyl carbon)                                       |                                                     |
| 0.0   | TSP, C <sub>4</sub> , C <sub>5</sub> , C <sub>6</sub> (methyl carbons)      | <b>TSP standard</b><br>                             |

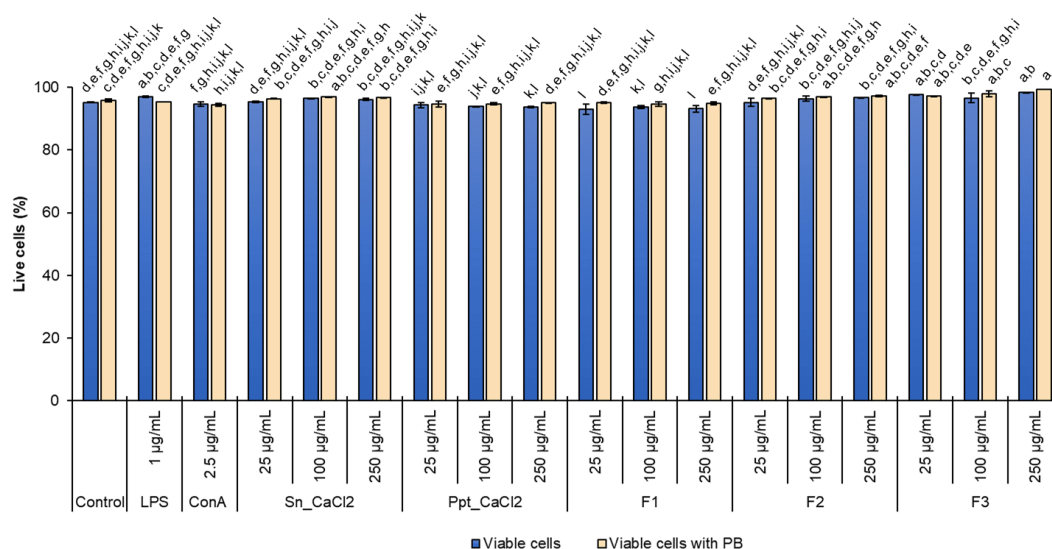

**Supplementary Figure S1.** Viable cells (%) cultured for 6 h with polysaccharide-enriched fractions obtained from *S. latissima* (Sn\_CaCl<sub>2</sub>, Ppt\_CaCl<sub>2</sub>, F1, F2, and F3) at the concentrations of 25, 100, and 250 µg/mL, in the absence and presence of polymyxin B (PB). Culture medium alone (RPMI) was used as negative control. Lipopolysaccharide (LPS) and concanavalin A (ConA) were used as positive controls. Mean ( $\pm$  SD) values are represented. Different letters above the bars indicate statistically significant differences between compared groups ( $p < 0.05$ ).

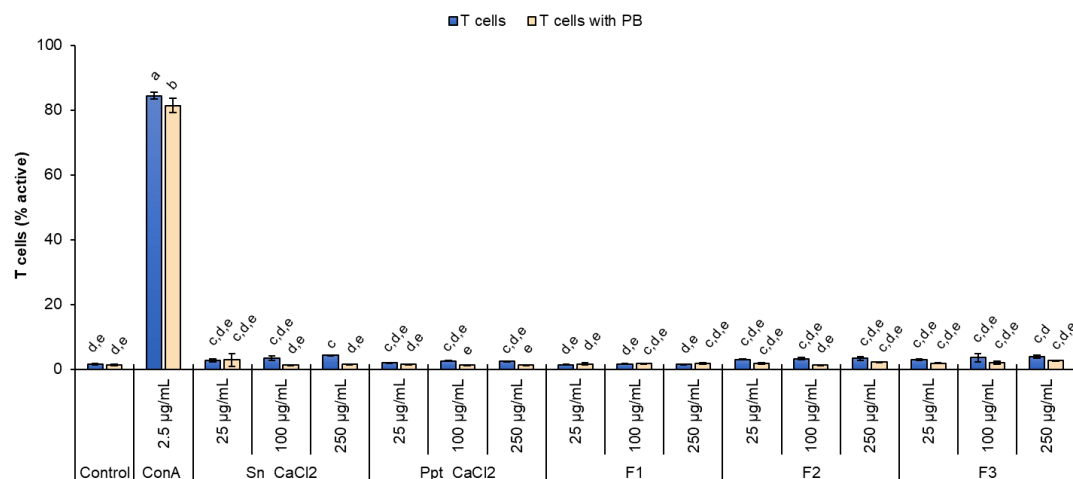

**Supplementary Figure S2.** Percentage of T cells activated by incubation with polysaccharide-enriched fractions obtained from *S. latissima* (Sn\_CaCl<sub>2</sub>, Ppt\_CaCl<sub>2</sub>, F1, F2, and F3) at the concentrations of 25, 100, and 250 µg/mL, in the absence and presence of polymyxin B (PB). Culture medium alone (RPMI) was used as negative control. Concanavalin A (ConA) was used as positive control. Mean ( $\pm$  SD) values are represented. Different letters above the bars indicate statistically significant differences between compared groups ( $p < 0.05$ ).

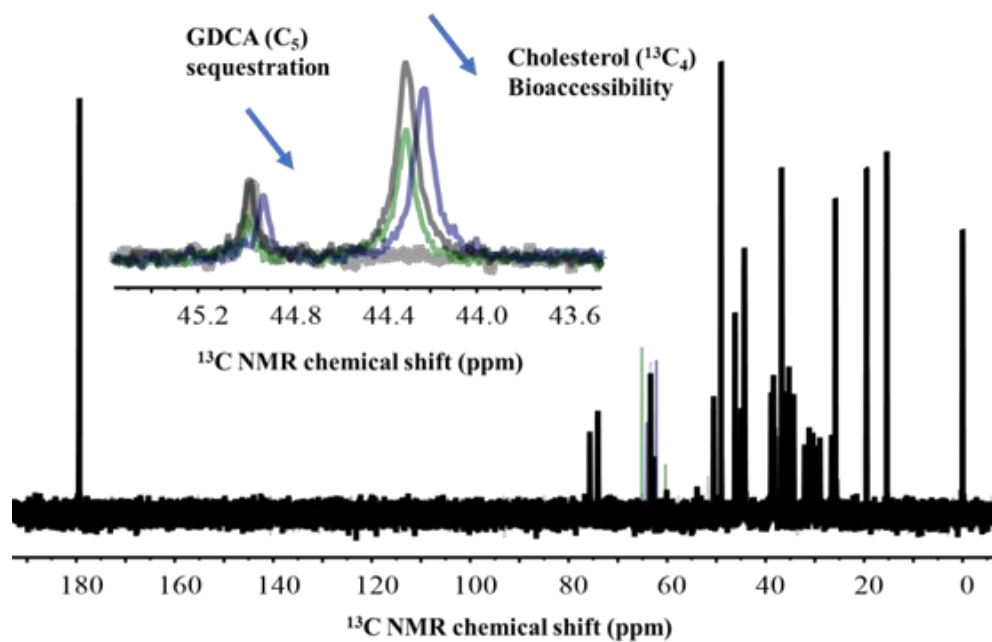

**Supplementary Figure S3.** Representative  $^{13}\text{C}$  NMR spectrum of GDCA bile salt solution 50 mM (grey), GDCA bile salt solution 50 mM with labelled  $^{13}\text{C}_4$  Cholesterol 3.5 mM (black) in the presence of cationic resin colestipol 5 mg/mL (green) or polysaccharide fucoidan (F2) 5 mg/mL (blue).

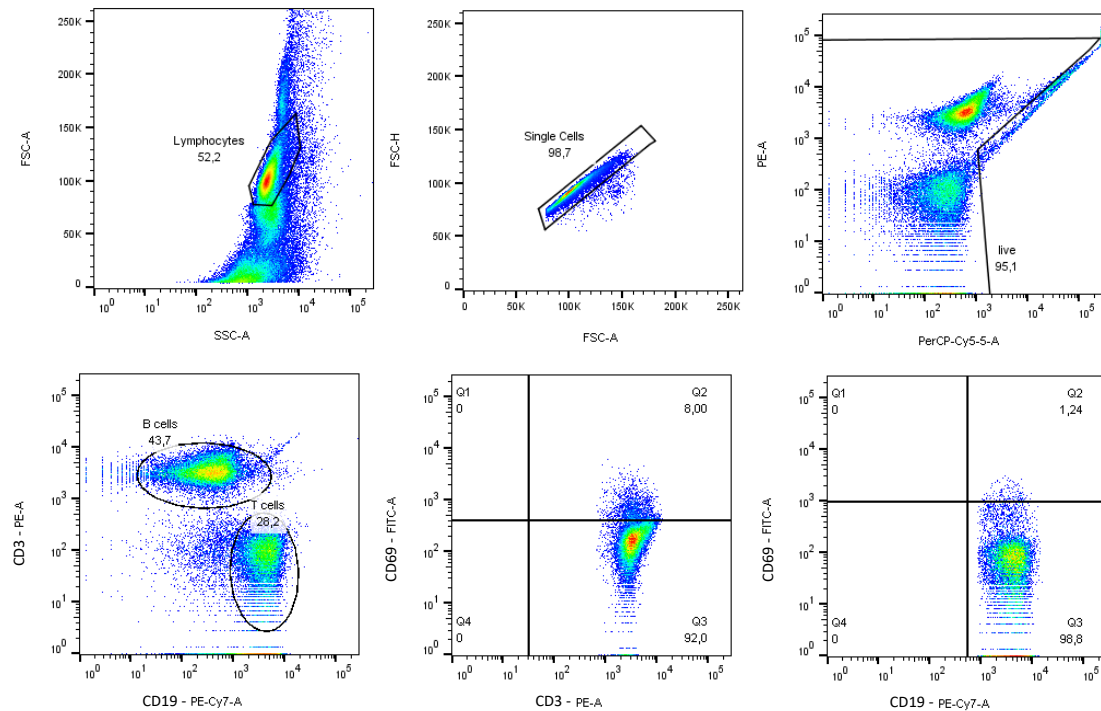

**Supplementary Figure S4.** Gating strategy for flow cytometry analysis. Representative dot plots are presented showing the gating strategy for lymphocytes (FCS vs SSC), non-aggregated cells (FCS-H vs FCS-A), live cells (propidium iodide), B and T cells (CD3 vs CD19), and activated cells (CD69 vs CD3 and CD69 vs CD19).
